# Supplementary material
Source: HighWire-hosted journal article supplement (https://erj.ersjournals.com/content/56/4/2001086)
Supplement: inline-supplementary-material-2 [file inline-supplementary-material-2.pdf]

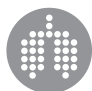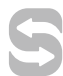

SHAREABLE PDF

# Towards elimination of childhood and adolescent tuberculosis in the Netherlands: an epidemiological time-series analysis of national surveillance data

Fajri Gafar<sup>1</sup>, Taichi Ochi<sup>1</sup>, Natasha van't Boveneind-Vrubleuskaya<sup>2,3</sup>, Onno W. Akkerman<sup>4,5</sup>, Connie Erkens<sup>6</sup>, Susan van den Hof<sup>7</sup>, Tjip S. van der Werf<sup>4,8</sup>, Jan-Willem C. Alffenaar<sup>2,9,10,11</sup> and Bob Wilffert<sup>1,2</sup>

**Affiliations:** <sup>1</sup>University of Groningen, Groningen Research Institute of Pharmacy, Unit of PharmacoTherapy, Epidemiology, and Economics, Groningen, The Netherlands. <sup>2</sup>University of Groningen, University Medical Center Groningen, Dept of Clinical Pharmacy and Pharmacology, Groningen, The Netherlands. <sup>3</sup>Dept of Public Health TB Control, Metropolitan Public Health Services, The Hague, The Netherlands. <sup>4</sup>University of Groningen, University Medical Center Groningen, Dept of Pulmonary Diseases and Tuberculosis, Groningen, The Netherlands. <sup>5</sup>University of Groningen, University Medical Center Groningen, Tuberculosis Center Beatrixoord, Haren, The Netherlands. <sup>6</sup>KNCV Tuberculosis Foundation, The Hague, The Netherlands. <sup>7</sup>National Institute for Public Health and the Environment, Centre for Infectious Disease Control, Bilthoven, The Netherlands. <sup>8</sup>University of Groningen, University Medical Center Groningen, Dept of Internal Medicine, Groningen, The Netherlands. <sup>9</sup>University of Sydney, Faculty of Medicine and Health, School of Pharmacy, Sydney, Australia. <sup>10</sup>Westmead Hospital, Sydney, Australia. <sup>11</sup>Marie Bashir Institute of Infectious Diseases, University of Sydney, Sydney, Australia.

**Correspondence:** Fajri Gafar, University of Groningen, Groningen Research Institute of Pharmacy, Unit of PharmacoTherapy, Epidemiology and Economics, Antonius Deusinglaan 1 (room: 3214.0450), 9713 AV Groningen, The Netherlands. E-mail: f.gafar@rug.nl

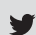

@ERSpublications

**During 1993–2018, TB notification in children in the Netherlands declined steadily, but there was an increase of TB in foreign-born adolescents. Enhancing active case-finding through contact investigation and entry screening is needed to optimise TB control.** <https://bit.ly/36AjNhm>

**Cite this article as:** Gafar F, Ochi T, van't Boveneind-Vrubleuskaya N, *et al.* Towards elimination of childhood and adolescent tuberculosis in the Netherlands: an epidemiological time-series analysis of national surveillance data. *Eur Respir J* 2020; 56: 2001086 [<https://doi.org/10.1183/13993003.01086-2020>].

This single-page version can be shared freely online.

## ABSTRACT

**Background:** Tuberculosis (TB) in children and adolescents is a sentinel event for ongoing transmission. In the Netherlands, epidemiological characteristics of childhood and adolescent TB have not been fully evaluated. Therefore, we aimed to assess TB epidemiology within this population to provide guidance for TB elimination.

**Methods:** A retrospective time-series analysis using national surveillance data from 1993–2018 was performed in children (aged <15 years) and adolescents (aged 15–19 years) with TB. Poisson regression models offset with log-population size were used to estimate notification rates and rate ratios. Trends in notification rates were estimated using average annual percentage changes (AAPC) based on the segmented linear regression analysis.

**Results:** Among 3899 children and adolescents with TB notified during 1993–2018, 2418 (62%) were

foreign-born (725 (41.3%) out of 1755 children and 1693 (78.9%) out of 2144 adolescents). The overall notification rate in children was 2.3 per 100 000 person-years, declining steadily during the study period (AAPC  $-10.9\%$ , 95% CI  $-12.6$ – $-9.1$ ). In adolescents, the overall notification rate was 8.4 per 100 000 person-years, strongly increasing during 1993–2001 and 2012–2018. Compared to Dutch-born children and adolescents, substantially higher notification rates were observed among African-born children and adolescents (116.8 and 316.6 per 100 000 person-years, respectively). Additionally, an increasing trend was observed in African-born adolescents (AAPC  $18.5\%$ , 95% CI  $11.9$ – $25.5$ ). Among the foreign-born population, those from countries in the horn of Africa contributed most to the TB caseload.

**Conclusion:** TB notification rate among children was low and constantly declining across different demographic groups. However, heterogeneities were shown in adolescents, with an increasing trend in the foreign-born, particularly those from Africa.
